# Supplementary material
Source: HighWire-hosted journal article supplement (https://www.cmaj.ca/highwire/filestream/147362/field_highwire_adjunct_files/4/220914-res-5-at.pdf)
Supplement: 220914-res-5-at.pdf [file 220914-res-5-at.pdf]

Supplementary Figure 5) Nomograms for both models with worked examples

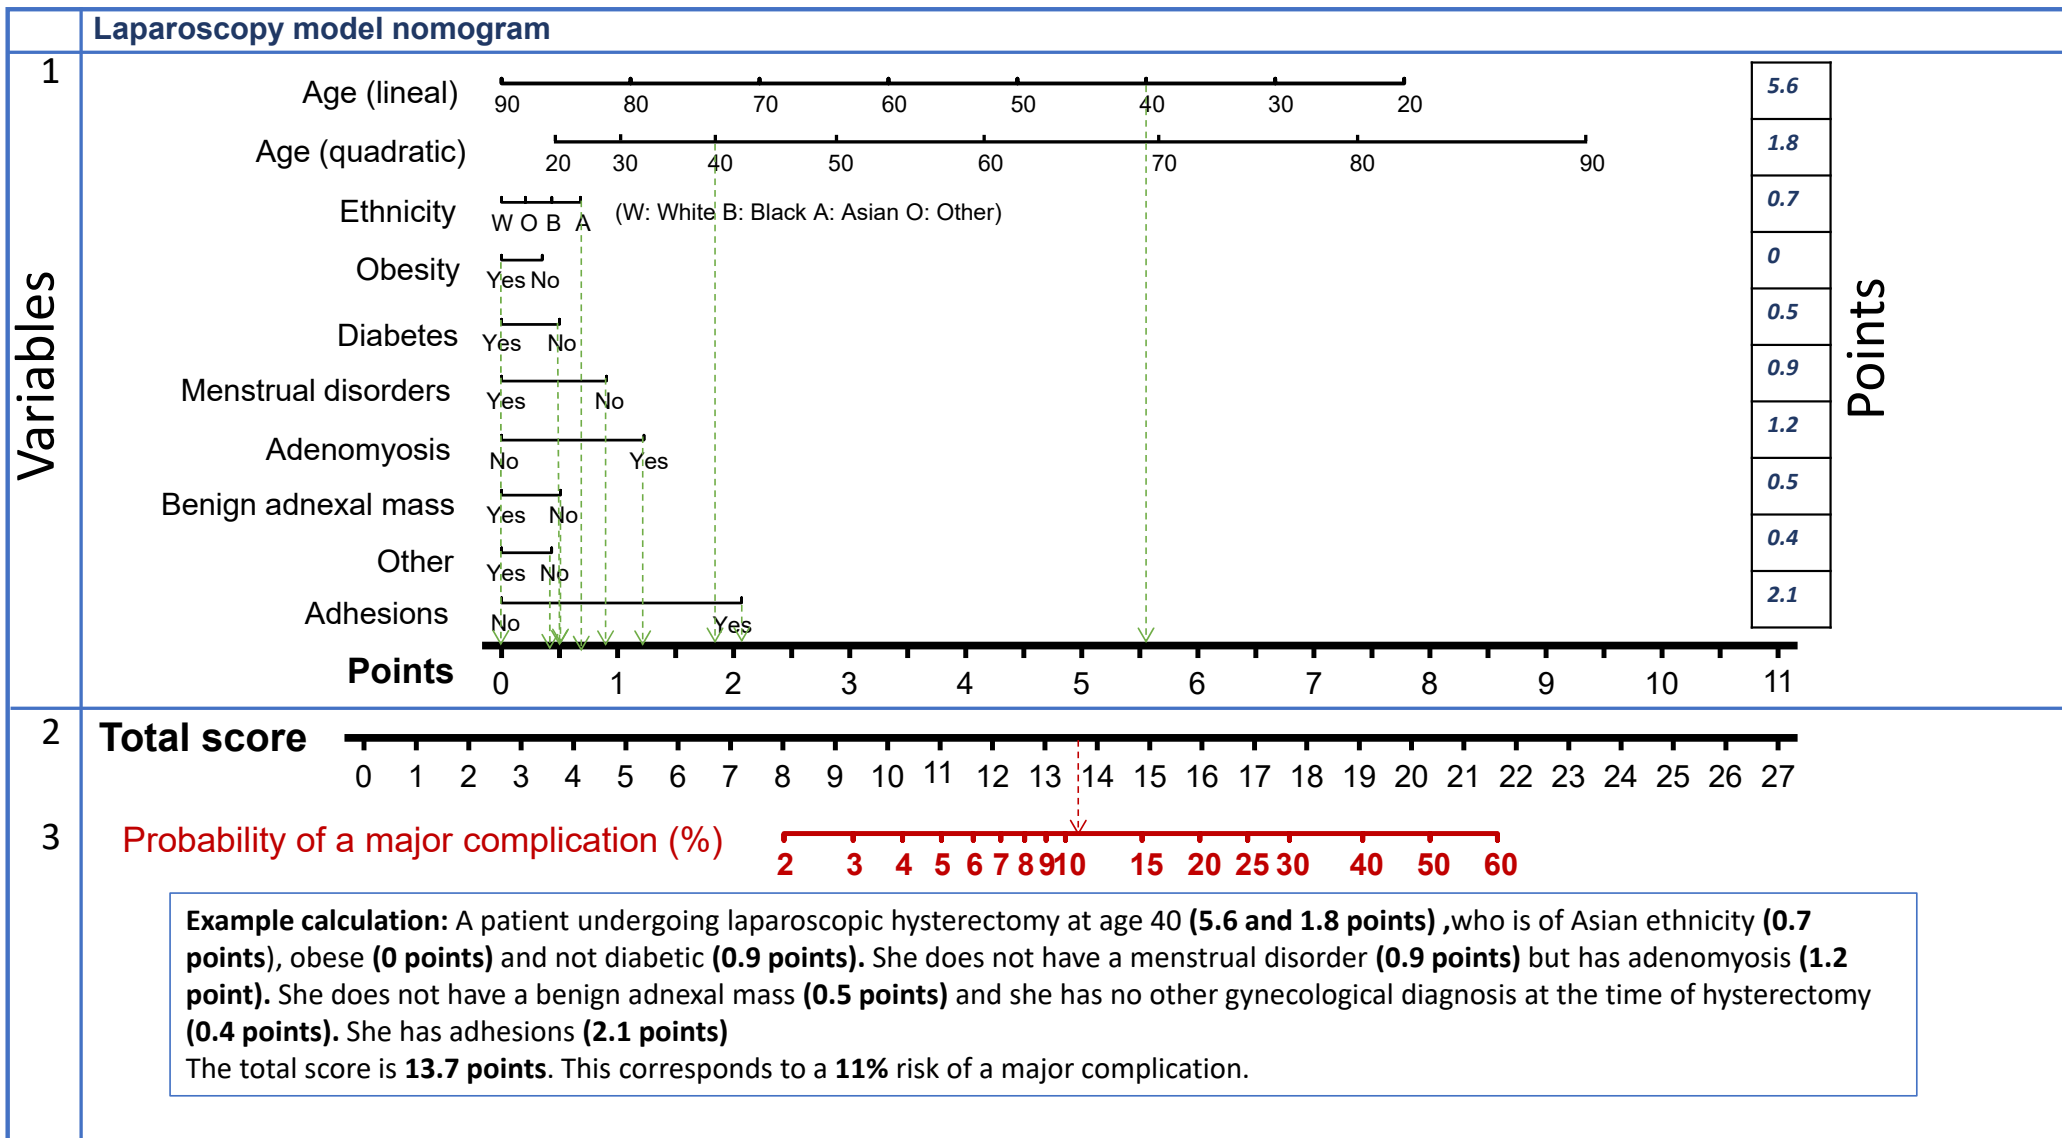

## Abdominal model nomogram

Variables

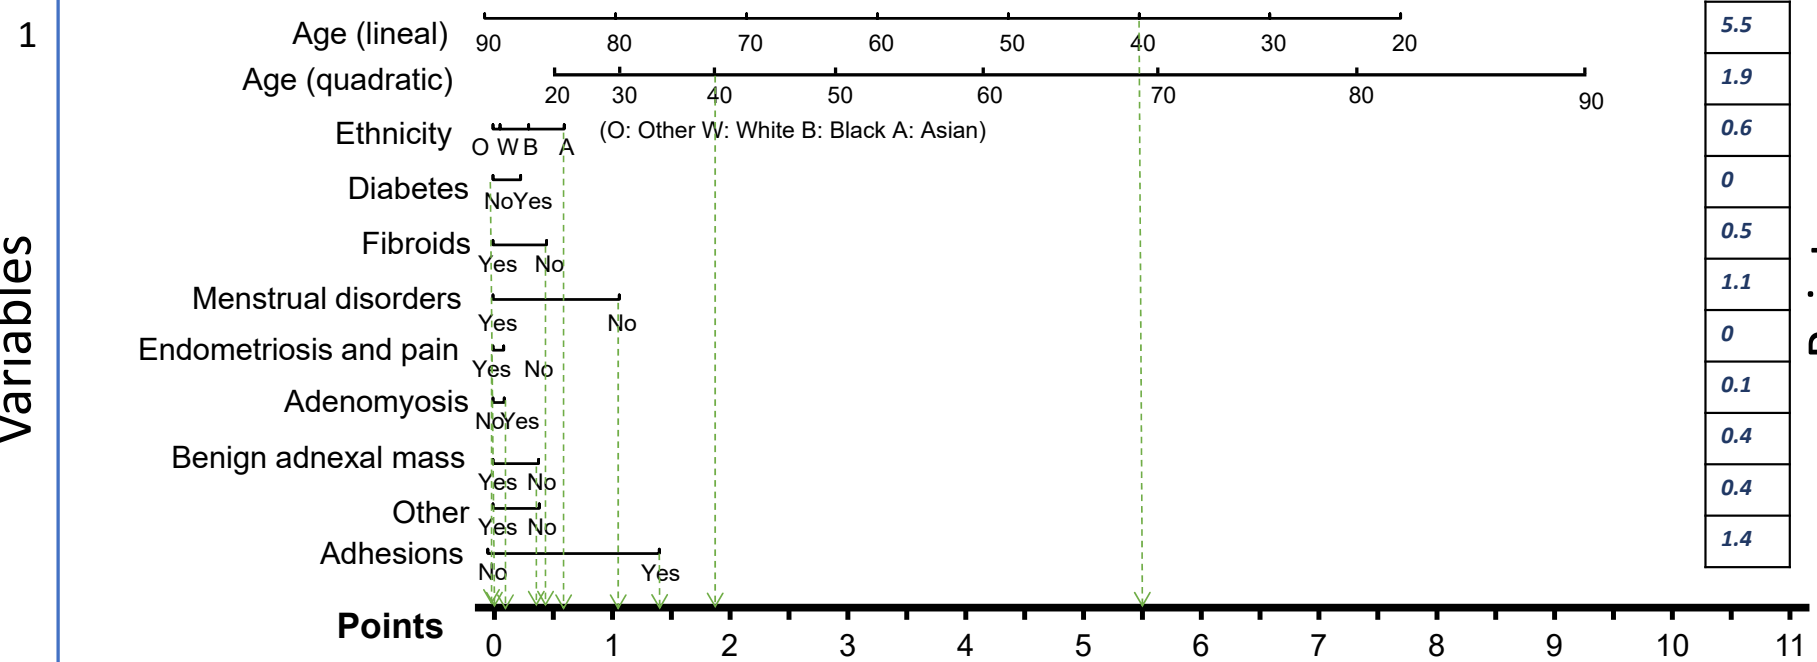

Points

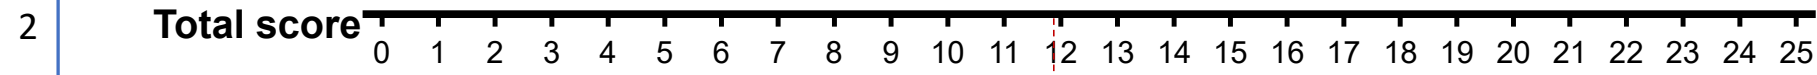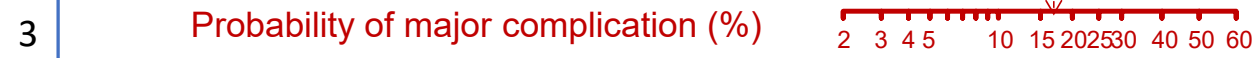

**Example calculation:** A patient undergoing abdominal hysterectomy at age 40 (5.5 and 1.9 points), who is of Asian ethnicity (0.6 points), and not diabetic (0 points). She does not have fibroids (0.4 points) She does not have a menstrual disorder (1 point) or endometriosis/pain (0 points). She does have adenomyosis (0.1 point). She does not have a benign adnexal mass (0.3 points) and she has no other gynecological diagnosis at the time of hysterectomy (0.3 points). She has adhesions (1.4 points)

The total score is **11.9 points**. This corresponds to an **18%** risk of a major complication.

Appendix 5, as supplied by the authors. Appendix to: Madhvani K, Fernandez Garcia S, Fernandez-Felix BM, et al. Predicting major complications in patients undergoing laparoscopic and open hysterectomy for benign indications. *CMAJ* 2022. DOI: 10.1503/cmaj.220914. Copyright © 2022 The Author(s) or their employer(s). To receive this resource in an accessible format, please contact us at cmajgroup@cmaj.ca.
